# Supplementary material for: Binding and Degradation Reaction of Hydroxide Ions with Several Quaternary Ammonium Head Groups of Anion Exchange Membranes Investigated by the DFT Method
Source: MDPI journal article supplement (doi:10.3390/molecules27092686), 2022-04-21
Supplement: s1 [file s1]

# Supplementary Material for

## “Binding and Degradation Reaction of Hydroxide Ions with Several Quaternary Ammonium Head Groups of Anion Exchange Membranes Investigated by the DFT Method”

Mirat Karibayev <sup>1</sup>, Bauyrzhan Myrzakhmetov <sup>2</sup>, Sandugash Kalybekkyzy <sup>2</sup>, Yanwei Wang <sup>1,3,\*</sup> and Almagul Mentbayeva <sup>1,2,\*</sup>

<sup>1</sup>Department of Chemical and Materials Engineering, School of Engineering and Digital Sciences, Nazarbayev University, Nur-Sultan 010000, Kazakhstan

<sup>2</sup>Laboratory of Advanced Materials and Systems for Energy Storage, Center for Energy and Advanced

Materials Science, National Laboratory Astana, Nazarbayev University, Nur-Sultan 010000, Kazakhstan

<sup>3</sup>Laboratory of Computational Materials Science for Energy Applications, Center for Energy and Advanced Materials Science, National Laboratory Astana, Nazarbayev University, Nur-Sultan 010000, Kazakhstan

\*Correspondence: yanwei.wang@nu.edu.kz (Y.W.); almagul.mentbayeva@nu.edu.kz (A.M.)

**Table S1:** The absolute energies of the calculated species and binding energies  $\Delta E_{\text{Binding}}$  of QA head groups with  $\text{OH}^-$  ion,  $\Delta E_{\text{binding}} = E_{\text{QA with OH}^-} - (E_{\text{QA}} + E_{\text{OH}^-})$ .

| QA  | E ( $\text{OH}^-$ )<br>(kJ/mol) | E (QA)<br>(kJ/mol) | E (QA with $\text{OH}^-$ )<br>(kJ/mol) | $\Delta E_{\text{binding}}$<br>(kJ/mol) |
|-----|---------------------------------|--------------------|----------------------------------------|-----------------------------------------|
| (a) | −199431.16                      | −1466500.19        | −1665964.27                            | −32.91                                  |
| (c) | −199431.16                      | −1169420.80        | −1368875.34                            | −23.37                                  |
| (f) | −199431.16                      | −1685662.20        | −1885115.30                            | −21.91                                  |
| (d) | −199431.16                      | −1475970.88        | −1675419.33                            | −17.28                                  |
| (e) | −199431.16                      | −1766722.23        | −1966162.29                            | −8.89                                   |
| (b) | −199431.16                      | −1618116.55        | −1817554.88                            | −7.16                                   |

**Table S2:** Values of the computed  $\Delta E_R$ , and  $\Delta E_A$  for  $S_N2$  degradation reaction mechanism of QA head group (c)/(f). Unit: kJ/mol; Water molecules are treated as water cluster on the product side.

| QA  | HL | E(R1)       | E(R2)      | E(TS <sup>-</sup> ) | E(P1)       | E(P2)      | E(P3)      | $\Delta E_R$ | BSSE  | $\Delta E_A$ |
|-----|----|-------------|------------|---------------------|-------------|------------|------------|--------------|-------|--------------|
| (c) | 0  | -1169446.34 | -199429.14 | -1368822.03         | -910761.97  | -458238.23 | —          | -124.72      | 11.89 | 41.56        |
|     | 1  | -1169446.34 | -400248.63 | -1569632.52         | -910761.97  | -458238.23 | -200764.45 | -69.67       | 8.88  | 53.57        |
|     | 2  | -1169446.34 | -601059.62 | -1770433.28         | -910761.97  | -458238.23 | -401545.78 | -40.02       | 7.76  | 64.91        |
|     | 3  | -1169446.34 | -801864.08 | -1971217.59         | -910761.97  | -458238.23 | -602329.96 | -19.74       | 6.14  | 86.69        |
| (f) | 0  | -1685699.31 | -199429.14 | -1885054.44         | -1427011.42 | -458238.23 | —          | -121.20      | 12.93 | 61.08        |
|     | 1  | -1685699.31 | -400248.63 | -2085861.60         | -1427011.42 | -458238.23 | -200764.45 | -66.15       | 10.16 | 76.17        |
|     | 2  | -1685699.31 | -601059.62 | -2286662.47         | -1427011.42 | -458238.23 | -401545.78 | -36.49       | 7.68  | 88.78        |
|     | 3  | -1685699.31 | -801864.08 | -2487450.75         | -1427011.42 | -458238.23 | -602329.96 | -16.21       | 6.39  | 106.25       |

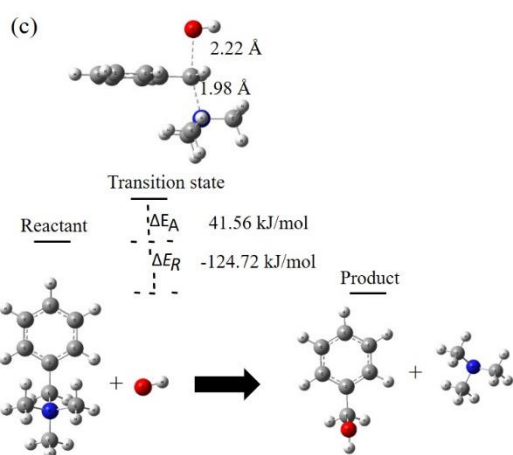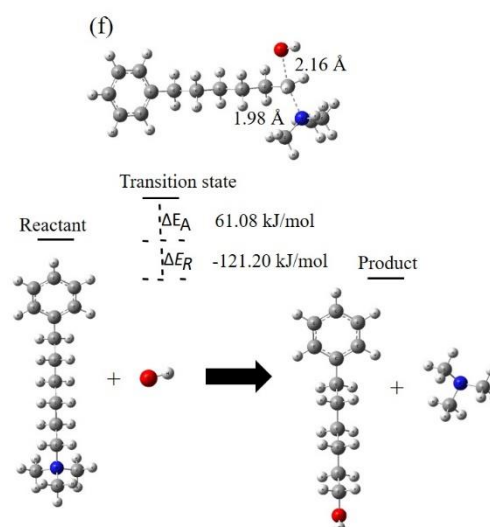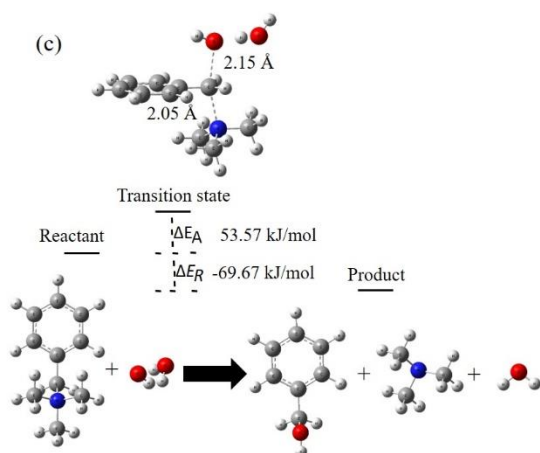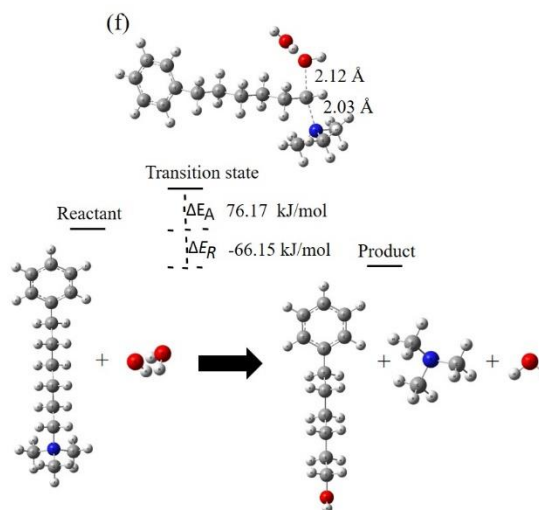

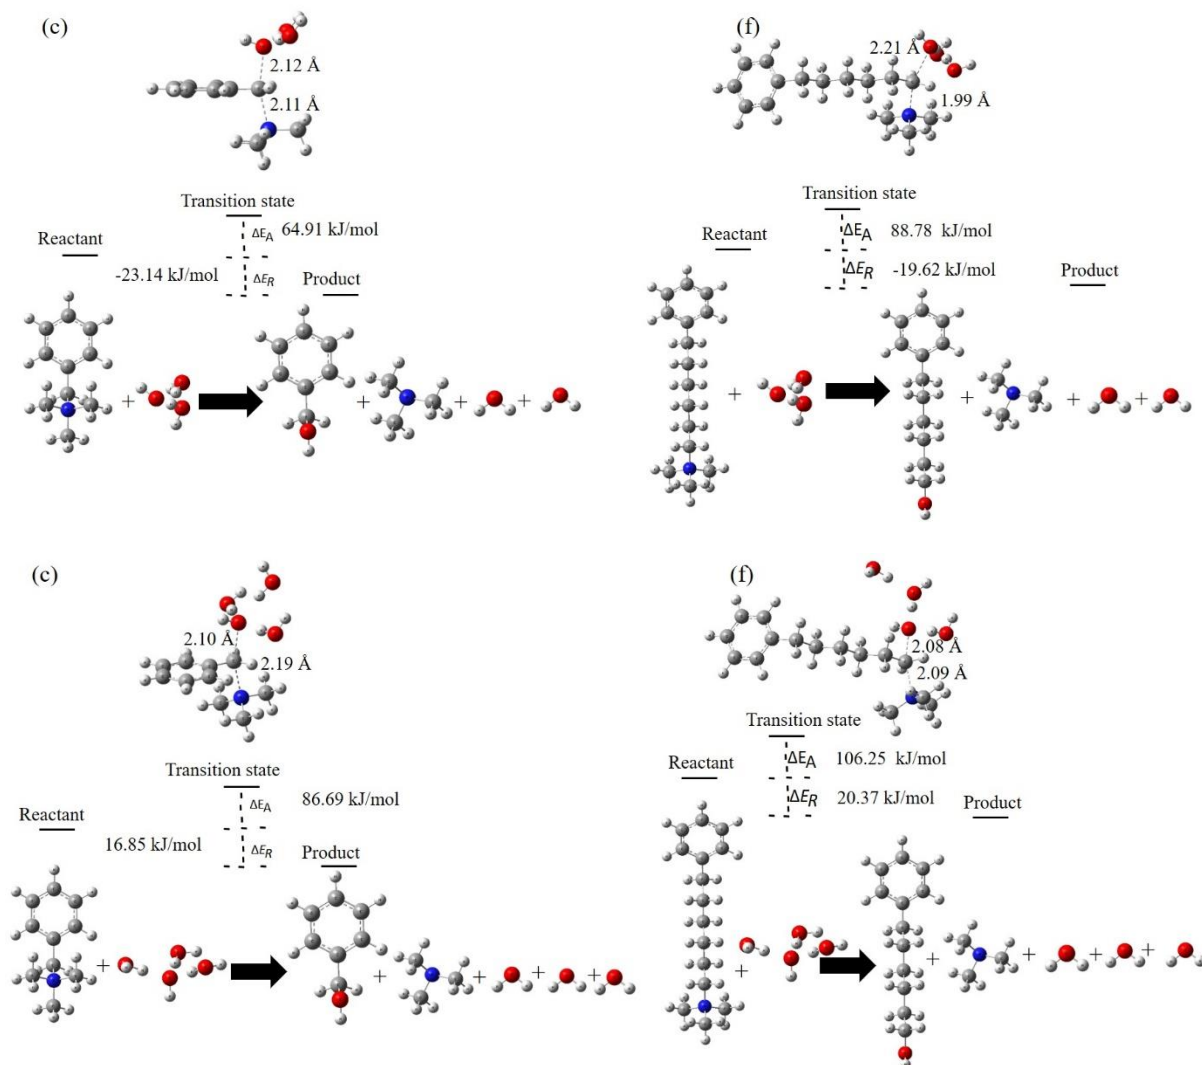

**Figure S1:**  $S_N2$  degradation reaction for QA head group (c), and QA head group (f) at the different HL; Water molecules are treated as isolated monomers on the product side.

**Table S3:** Values of the computed  $\Delta E_R$ , and  $\Delta E_A$  for  $S_N2$  degradation reaction mechanism of QA head group (c)/(f). Unit: kJ/mol; Water are treated as isolated monomers on the product side.

| QA  | HL | E(R1)       | E(R2)      | E(TS <sup>-</sup> ) | E(P1)       | E(P2)      | E(P3)      | $\Delta E_R$ | BSSE  | $\Delta E_A$ |
|-----|----|-------------|------------|---------------------|-------------|------------|------------|--------------|-------|--------------|
| (c) | 0  | -1169446.34 | -199429.14 | -1368822.03         | -910761.97  | -458238.23 | —          | -124.72      | 11.89 | 41.56        |
|     | 1  | -1169446.34 | -400248.63 | -1569632.52         | -910761.97  | -458238.23 | -200764.45 | -69.67       | 8.88  | 53.57        |
|     | 2  | -1169446.34 | -601059.62 | -1770433.28         | -910761.97  | -458238.23 | -401528.91 | -23.14       | 7.76  | 64.91        |
|     | 3  | -1169446.34 | -801864.08 | -1971217.59         | -910761.97  | -458238.23 | -602293.37 | 16.85        | 6.14  | 86.69        |
| (f) | 0  | -1685699.31 | -199429.14 | -1885054.44         | -1427011.42 | -458238.23 | —          | -121.20      | 12.93 | 61.08        |
|     | 1  | -1685699.31 | -400248.63 | -2085861.60         | -1427011.42 | -458238.23 | -200764.45 | -66.15       | 10.16 | 76.17        |
|     | 2  | -1685699.31 | -601059.62 | -2286662.47         | -1427011.42 | -458238.23 | -401528.91 | -19.62       | 7.68  | 88.78        |
|     | 3  | -1685699.31 | -801864.08 | -2487450.75         | -1427011.42 | -458238.23 | -602293.37 | 20.37        | 6.39  | 106.25       |
